## Direct Inhibition of the N-methyl-D-aspartate Receptor Channel by High Concentrations of Opioids

Tomohiro Yamakura, M.D.,\* Kenji Sakimura, Ph.D.,† Koki Shimoji, M.D.‡

**Background:** Electrophysiologic and receptor binding studies showed that some opioids have noncompetitive N-methyl-D-aspartate (NMDA) receptor antagonist properties.

**Methods:** The effects and mechanisms of action of various opioid compounds were examined on four kinds of heteromeric NMDA receptor channels, namely the  $\epsilon 1/\zeta 1$ ,  $\epsilon 2/\zeta 1$ ,  $\epsilon 3/\zeta 1$ , and  $\epsilon 4/\zeta 1$  channels, expressed in *Xenopus* oocytes. Furthermore, the action sites of opioids on NMDA receptor channels were investigated by site-directed mutagenesis.

**Results:** Meperidine inhibited four kinds of channels to a similar extent with inhibitor concentrations for half-control response ( $IC_{50}$ s) of 210–270  $\mu M$ . Morphine, fentanyl, codeine, and naloxone also inhibited NMDA receptor channels with affinities comparable to meperidine. Opioid inhibition exhibited voltage dependence and was quite effective at negative potentials. Opioids also shifted the inhibition curve of  $Mg^{2+}$  to the right. Furthermore, replacement of the conserved asparagine residue with glutamine in the channel-lining segment M2 of the  $\zeta 1$  subunit, which constitutes the block sites of  $Mg^{2+}$  and ketamine, reduced the sensitivity to opioids, whereas that of the  $\epsilon 2$  subunit barely affected the opioid sensitivity.

**Conclusions:** These results, together with previous findings, suggest that the low-affinity NMDA receptor antagonist activity is a common characteristic of various opioid compounds, and that the inhibition is a result of channel-block mechanisms at the site, which partially overlaps with those of  $Mg^{2+}$  and ketamine. This antagonist property of opioids may be clinically significant in the spinal cord following epidural or intrathecal administration, after which the cerebrospinal fluid concentrations of some opioids reach the high micromolar level. (Key words: Channel blocker; dissociative anesthetics; glutamate receptor; subunit.)

\* Instructor, Department of Anesthesiology.

† Professor, Department of Cellular Neurobiology, Brain Research Institute.

‡ Professor and Chairman, Department of Anesthesiology.

Received from the Departments of Anesthesiology and Cellular Neurobiology, Niigata University School of Medicine, Niigata, Japan. Submitted for publication January 19, 1999. Accepted for publication May 14, 1999. Supported by a grant-in-aid (no. 10671407) from the Japanese Ministry of Education, Science and Culture, Tokyo, Japan.

Address reprint requests to Dr. Yamakura: Department of Anesthesiology, Niigata University School of Medicine, 1-757 Asahimachi, Niigata 951-8510, Japan. Address electronic mail to: yamakura@med.niigata-u.ac.jp

HIGH concentrations of various opioid agonists and antagonists protect neurons against central nervous system ischemia and injury and neurotoxicity of exogenously applied N-methyl-D-aspartate (NMDA).<sup>1-3</sup> More recent electrophysiologic and receptor binding studies have found that some opioid agonists, such as meperidine, methadone, and ketobemidone, reduce NMDA-induced depolarization in rat-brain slice preparations and inhibit [<sup>3</sup>H]MK-801 (dizocilpine) binding in rat cortical and forebrain membranes.<sup>4-6</sup> These studies suggest that some opioids have NMDA receptor antagonist properties. However, it is uncertain whether the NMDA receptor antagonist activity is a property common to various opioid compounds. In addition, mechanisms of NMDA receptor channel inhibition by opioids remain to be characterized.

Cloning and expression studies have revealed the molecular heterogeneity of the NMDA receptor channel.<sup>7</sup> The mouse NMDA receptor channel is composed of at least two families of subunits, the  $\epsilon$  (rat NR2) and  $\zeta$  (rat NR1) subfamilies of the glutamate receptor channel, which share amino acid sequence homology with the subunits of the  $\alpha$ -amino-3-hydroxy-5-methyl-4-isoxazole propionic acid (AMPA)- or kainate-selective glutamate receptor channels. The functional properties of the  $\epsilon/\zeta$  heteromeric NMDA receptor channels are determined by the constituting  $\epsilon$  subunit species ( $\epsilon 1$ – $\epsilon 4$ ). The heteromeric  $\epsilon 1/\zeta 1$ ,  $\epsilon 2/\zeta 1$ ,  $\epsilon 3/\zeta 1$ , and  $\epsilon 4/\zeta 1$  channels exhibit different affinities for agonists and different sensitivities to  $Mg^{2+}$  block and competitive and noncompetitive antagonists. The  $\epsilon 1$  and  $\zeta 1$  subunit mRNAs are widely distributed in the brain, whereas the  $\epsilon 2$  subunit mRNA is expressed abundantly in the forebrain. The  $\epsilon 3$  subunit mRNA is predominantly found in the cerebellum, but the  $\epsilon 4$  subunit mRNA is weakly expressed in the diencephalon and the brainstem. Reports on expression patterns in the adult spinal cord are controversial. The  $\zeta 1$ ,  $\epsilon 1$ , and  $\epsilon 2$  subunit mRNAs are the predominant transcripts detected in the mouse cervical cord,<sup>8</sup> whereas the NR1- $\zeta 1$ , NR2C- $\epsilon 3$ , and NR2D- $\epsilon 4$  subunit mRNAs are found in the rat lumbar spinal cord.<sup>9</sup>

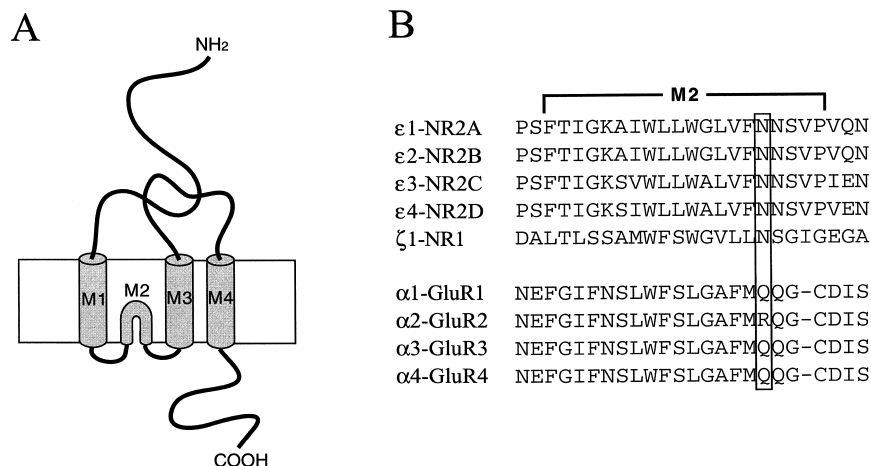

**Fig. 1.** Schematic representations of the proposed structure of glutamate receptor channel subunits. **(A)** Three transmembrane segment topology model. **(B)** Amino acid sequences of segment M2 of the glutamate receptor channel subunits selective for NMDA ( $\epsilon$ 1,  $\epsilon$ 2,  $\epsilon$ 3,  $\epsilon$ 4, and  $\zeta$ 1) and those selective for AMPA ( $\alpha$ 1,  $\alpha$ 2,  $\alpha$ 3, and  $\alpha$ 4). The box indicates the Q (glutamine)/R (arginine)/N (asparagine) site of the glutamate receptor channel subunits, which determines the permeability and block by divalent cations.

NMDA receptor channel subunits have four hydrophobic segments (M1–M4) within their central regions. According to the three transmembrane segment model, segment M2 forms a reentrant membrane loop with both ends facing the cytoplasm, and the carboxyl-terminal region resides in the cytoplasm (fig. 1A).<sup>7</sup> Site-directed mutagenesis has revealed that the conserved asparagine (N) residues in segment M2 of the  $\epsilon$  and  $\zeta$  subunits govern both  $Mg^{2+}$  block and  $Ca^{2+}$  permeability of NMDA receptor channels, thus indicating that segment M2 constitutes the ion-channel pore of NMDA receptor channels.<sup>10,11</sup> The position of this asparagine residue corresponds to that of glutamine (Q) or arginine (R) of the  $\alpha$  subunits, which determines the  $Ca^{2+}$  permeability of the AMPA-selective glutamate receptor channel<sup>12</sup> (fig. 1B).

In the present investigation, we examined the effects and mechanisms of action of various opioid compounds (phenylpiperidine derivatives meperidine and fentanyl, naturally occurring opioids morphine and codeine, and opioid antagonist naloxone) on the  $\epsilon$ 1/ $\zeta$ 1,  $\epsilon$ 2/ $\zeta$ 1,  $\epsilon$ 3/ $\zeta$ 1 and  $\epsilon$ 4/ $\zeta$ 1 heteromeric NMDA channels expressed in *Xenopus* oocytes. Furthermore, the action sites of opioids on NMDA receptor channels were investigated by site-directed mutagenesis.

## Materials and Methods

### Subunit-specific mRNA Preparation and Expression in *Xenopus* Oocytes

Subunit-specific mRNAs were synthesized *in vitro* with SP6 or T3 RNA polymerase (Ambion MEGAscript) in the presence of cap dinucleotides <sup>7</sup>mGpppG. The  $\epsilon$ 1,  $\epsilon$ 2,  $\epsilon$ 3,  $\epsilon$ 4, and  $\zeta$ 1 subunit-specific mRNAs (for the expression of

the  $\epsilon$ 1/ $\zeta$ 1,  $\epsilon$ 2/ $\zeta$ 1,  $\epsilon$ 3/ $\zeta$ 1, and  $\epsilon$ 4/ $\zeta$ 1 channels) were synthesized using pSPGR $\epsilon$ 1,<sup>13</sup> pSPGR $\epsilon$ 2,<sup>14</sup> pSPGR $\epsilon$ 3,<sup>15</sup> pSPGR $\epsilon$ 4,<sup>16</sup> and pSPGR $\zeta$ 1,<sup>15</sup> respectively. The  $\epsilon$ 2,  $\epsilon$ 2-N589Q,  $\zeta$ 1, and  $\zeta$ 1-N598Q subunit-specific mRNAs (for the expression of the  $\epsilon$ 2-N589Q/ $\zeta$ 1,  $\epsilon$ 2/ $\zeta$ 1-N598Q, and  $\epsilon$ 2-N589Q/ $\zeta$ 1-N598Q channels) were synthesized using pBKSA $\epsilon$ 2,<sup>17</sup> pBKSA $\epsilon$ 2-N589Q,<sup>11</sup> pBKSA $\zeta$ 1,<sup>18</sup> and pBKSA $\zeta$ 1-N598Q,<sup>11</sup> respectively. The  $\alpha$ 1 and  $\alpha$ 2 subunit-specific mRNAs for the  $\alpha$ 1/ $\alpha$ 2 AMPA-selective glutamate receptor channel were synthesized using pSPGR1 and pSPGR2, respectively.<sup>19</sup>

*Xenopus laevis* oocytes were injected with the wild-type or mutant  $\epsilon$  subunit-specific mRNA and the wild-type or mutant  $\zeta$  subunit-specific mRNA at a molar ratio of 1:1, or with the  $\alpha$ 1 and  $\alpha$ 2 subunit-specific mRNAs at a molar ratio of 10:1; the total amount of mRNAs injected per oocyte was approximately 0.6 ng for the  $\epsilon$ 1/ $\zeta$ 1 and  $\epsilon$ 2/ $\zeta$ 1 channels; 14 ng for the  $\epsilon$ 3/ $\zeta$ 1 and  $\epsilon$ 4/ $\zeta$ 1 channels; 4 ng for the  $\epsilon$ 2-N589Q/ $\zeta$ 1,  $\epsilon$ 2/ $\zeta$ 1-N598Q, and  $\epsilon$ 2-N589Q/ $\zeta$ 1-N598Q channels; and 10 ng for the  $\alpha$ 1/ $\alpha$ 2 channel.

### Electrophysiological Analyses

After incubation at approximately 19°C for 2 or 3 days, whole-cell currents evoked by bath application of agonists for approximately 15 s were recorded at  $-70$  mV membrane potential with a conventional two-micropipette voltage clamp.<sup>19</sup> The current responses of the wild-type and mutant  $\epsilon$ / $\zeta$  channels to  $10 \mu M$  L-glutamate plus  $10 \mu M$  glycine (almost saturating concentrations for all  $\epsilon$ / $\zeta$  channels) were measured in  $Ba^{2+}$ -Ringer's solution to minimize the effects of secondarily activated  $Ca^{2+}$ -dependent  $Cl^-$  currents.<sup>20</sup> The current responses of the  $\alpha$ 1/ $\alpha$ 2 channel to  $100 \mu M$  kainate were measured in normal frog Ringer's solution. For measurement of the

effects of opioids on NMDA receptor channels, opioids were continuously perfused during the experiment. Pre-application of opioids in the absence of agonists did not produce any current response in either wild-type or mutant channels. Agonists were applied three times successively during perfusion of opioids, and the effects on the second and third applications of agonists were averaged. The second and third current responses during perfusion of opioids were of similar magnitude, indicating that the effects of opioids were fully established in this recording system.  $\text{Ba}^{2+}$ -Ringer's solution contained 115 mM NaCl, 2.5 mM KCl, 1.8 mM  $\text{BaCl}_2$ , and 10 mM HEPES-NaOH (pH 7.2). Normal frog Ringer's solution contained 115 mM NaCl, 2.5 mM KCl, 1.8 mM  $\text{CaCl}_2$ , and 10 mM HEPES-NaOH (pH 7.2).

#### Compounds

Meperidine hydrochloride was purchased from Tanabe Seiyaku (Osaka, Japan). Morphine hydrochloride, codeine phosphate, and fentanyl citrate were from Sankyo (Tokyo, Japan). Naloxone hydrochloride was from Sigma Chemical (St. Louis, MO). Meperidine, morphine, codeine, and naloxone were dissolved in distilled water at a concentration of 100 mM. Fentanyl was dissolved in dimethyl sulfoxide at a concentration of 100 mM. The dimethyl sulfoxide stocks were diluted to appropriate concentrations in Ringer's solution. Perfusion of the highest concentrations of dimethyl sulfoxide used in this investigation (1% for 1 mM fentanyl) inhibited the current responses of the  $\epsilon 2/\zeta 1$  channel by  $5 \pm 1\%$  (mean  $\pm$  SEM,  $n = 4$ ).

#### Statistical Analysis

The inhibitor concentration for half-control response ( $\text{IC}_{50}$ ) and the Hill coefficient values for opioids of the  $\epsilon/\zeta$  channel were calculated according to the equation  $\text{Ropi} = 1/[1 + (O/\text{IC}_{50})^n]$ , where  $\text{Ropi}$  represents the relative response,  $O$  the concentration of opioids, and  $n$  the Hill coefficient. The agonist concentration for half-control response ( $\text{EC}_{50}$ ) of the  $\epsilon/\zeta$  channel was calculated according to the equation  $\text{Rago} = \text{Fopi}/[1 + (\text{EC}_{50}/A)^n]$ , where  $\text{Rago}$  represents the relative response,  $\text{Fopi}$  the residual fraction by opioid inhibition of responses to saturating concentrations of agonists,  $A$  the concentration of agonists, and  $n$  the Hill coefficient. For quantitative estimates of the voltage dependence of block by opioids, data were analyzed using the Woodhull model<sup>21</sup> by fitting the data to the equation  $\text{Ropi} = 1/[1 + (O/K_{d(O)} \exp(z\delta FE/RT))]$ , where  $\text{Ropi}$  represents the relative response,  $O$  the concentration of

opioids,  $K_{d(O)}$  the equilibrium dissociation constant of opioids at a membrane potential of 0 mV,  $z$  the charge of opioids,  $\delta$  the portion of the membrane electric field sensed at the blocking site,  $E$  the membrane potential,  $F$  the Faraday constant,  $R$  the gas constant, and  $T$  the absolute temperature. The results obtained were statistically analyzed by the Student  $t$  test or one-way analysis of variance (ANOVA) followed by Scheffé's multiple comparison tests.  $P < 0.05$  was considered significant. Data were represented as mean  $\pm$  SEM.

## Results

#### Effects of Opioids on Four Kinds of $\epsilon/\zeta$ Heteromeric NMDA Receptor Channels

Four kinds of heteromeric NMDA receptor channels, the  $\epsilon 1/\zeta 1$ ,  $\epsilon 2/\zeta 1$ ,  $\epsilon 3/\zeta 1$ , and  $\epsilon 4/\zeta 1$  channels, were expressed in *Xenopus* oocytes by the injection of respective subunit-specific mRNAs synthesized *in vitro* from cloned cDNAs. The sensitivities of these  $\epsilon/\zeta$  heteromeric channels to opioids were examined by measuring current responses to  $10 \mu\text{M}$  L-glutamate plus  $10 \mu\text{M}$  glycine during continuous perfusion of meperidine at  $-70$  mV membrane potential in  $\text{Ba}^{2+}$ -Ringer's solution. Meperidine inhibited the current responses of the  $\epsilon/\zeta$  NMDA receptor channels (fig. 2A). After the meperidine was washed out, application of agonists two or three times fully recovered the current responses. The dose-inhibition relationships for meperidine of four kinds of heteromeric channels were examined (fig. 2B). Meperidine inhibited the  $\epsilon 1/\zeta 1$ ,  $\epsilon 2/\zeta 1$ ,  $\epsilon 3/\zeta 1$ , and  $\epsilon 4/\zeta 1$  channels to a similar extent in a concentration-dependent manner. The  $\text{IC}_{50}$  values ( $\mu\text{M}$ ) of the  $\epsilon 1/\zeta 1$ ,  $\epsilon 2/\zeta 1$ ,  $\epsilon 3/\zeta 1$ , and  $\epsilon 4/\zeta 1$  channels for meperidine were  $233 \pm 14$  ( $n = 6$ ),  $206 \pm 7$  ( $n = 7$ ),  $264 \pm 9$  ( $n = 6$ ), and  $273 \pm 12$  ( $n = 6$ ), respectively. The  $\epsilon 2/\zeta 1$  channel was more sensitive to meperidine than the  $\epsilon 3/\zeta 1$  and  $\epsilon 4/\zeta 1$  channels ( $\log[\text{IC}_{50}]$  values were compared by ANOVA followed by Scheffé's multiple comparison tests;  $P < 0.01$ ). On the other hand, 1 mM meperidine only inhibited the current responses of the  $\alpha 1/\alpha 2$  glutamate receptor channel selective for AMPA by  $6 \pm 3\%$  ( $n = 5$ ). Thus, the inhibitory effects of meperidine are likely to be selective for NMDA receptor channels out of the glutamate receptor channels. Because meperidine inhibited NMDA receptor channels, the effects of other opioid agonists and antagonists on NMDA receptor channels were examined. Morphine also inhibited the four  $\epsilon/\zeta$  channels in

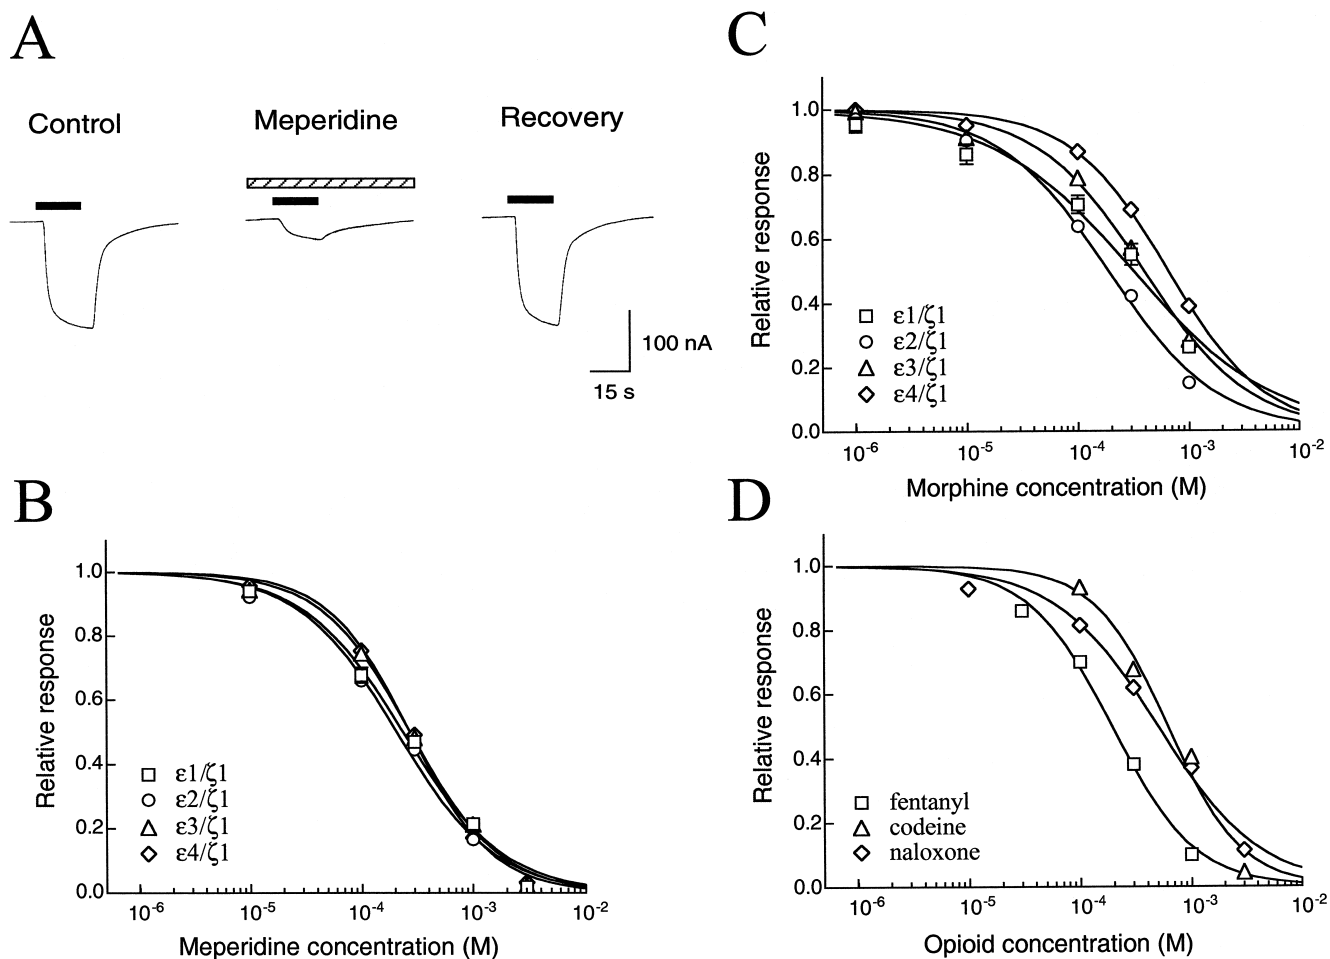

**Fig. 2.** The effects of various opioids on heteromeric NMDA receptor channels. (A) The current responses of the  $\epsilon 1/\zeta 1$  channel before (left), during (middle), and after (right) perfusion of 1 mM meperidine. Inward current is downward. The duration of bath application of 10  $\mu\text{M}$  L-glutamate plus 10  $\mu\text{M}$  glycine is indicated by bars without taking into account the dead-space time in the perfusion system (approximately 2 s). The duration of meperidine perfusion is indicated by the hatched column. (B) The dose-inhibition relationships for meperidine of four heteromeric  $\epsilon/\zeta$  channels. Each point represents the mean  $\pm$  SEM of measurements on six or seven oocytes; SEMs are indicated by bars if larger than the symbols. The  $\text{IC}_{50}$  values ( $\mu\text{M}$ , mean  $\pm$  SEM) of the  $\epsilon 1/\zeta 1$ ,  $\epsilon 2/\zeta 1$ ,  $\epsilon 3/\zeta 1$ , and  $\epsilon 4/\zeta 1$  channels for meperidine were  $233 \pm 14$ ,  $206 \pm 7$ ,  $264 \pm 9$ , and  $273 \pm 12$ , respectively, and the Hill coefficient values of those were  $1.00 \pm 0.03$ ,  $0.99 \pm 0.03$ ,  $1.14 \pm 0.01$ , and  $1.21 \pm 0.02$ , respectively. (C) The dose-inhibition relationships for morphine of four heteromeric  $\epsilon/\zeta$  channels. The  $\text{IC}_{50}$  values ( $\mu\text{M}$ ) of the  $\epsilon 1/\zeta 1$ ,  $\epsilon 2/\zeta 1$ ,  $\epsilon 3/\zeta 1$ , and  $\epsilon 4/\zeta 1$  channels for morphine were  $321 \pm 48$ ,  $187 \pm 9$ ,  $392 \pm 27$ , and  $650 \pm 24$ , respectively, and the Hill coefficient values of those were  $0.72 \pm 0.07$ ,  $0.90 \pm 0.05$ ,  $0.92 \pm 0.06$  and  $1.01 \pm 0.02$ , respectively ( $n = 6$  or  $7$ ). (D) The effects of fentanyl, codeine and naloxone on the  $\epsilon 2/\zeta 1$  channel. The  $\text{IC}_{50}$  values ( $\mu\text{M}$ ) of the  $\epsilon 2/\zeta 1$  channel for fentanyl, codeine, and naloxone were  $192 \pm 9$ ,  $613 \pm 25$ , and  $503 \pm 34$ , respectively, and the Hill coefficient values for those were  $1.18 \pm 0.03$ ,  $1.32 \pm 0.03$ , and  $0.95 \pm 0.02$ , respectively ( $n = 7$  or  $8$ ). The control current responses (nA) of the  $\epsilon 1/\zeta 1$ ,  $\epsilon 2/\zeta 1$ ,  $\epsilon 3/\zeta 1$ , and  $\epsilon 4/\zeta 1$  channels obtained before perfusion of opioids were 160–788, 165–888, 65–440, and 80–370, respectively.

a dose-dependent manner. The sensitivities to morphine varied between the four  $\epsilon/\zeta$  channels ( $\log[\text{IC}_{50}]$  values were compared by ANOVA;  $P < 0.0001$ ; fig. 2C). The  $\text{IC}_{50}$  values ( $\mu\text{M}$ ) of the  $\epsilon 1/\zeta 1$ ,  $\epsilon 2/\zeta 1$ ,  $\epsilon 3/\zeta 1$  and  $\epsilon 4/\zeta 1$  channels were  $321 \pm 48$  ( $n = 7$ ),  $187 \pm 9$  ( $n = 7$ ),  $392 \pm 27$  ( $n = 6$ ) and  $650 \pm 24$  ( $n = 7$ ), respectively. The  $\epsilon 2/\zeta 1$  channel was the most sensitive to morphine among the

four  $\epsilon/\zeta$  channels (Scheffé's multiple comparison tests,  $P < 0.05$ ). In addition, fentanyl, codeine, and naloxone also inhibited NMDA receptor channels in a dose-dependent manner (fig. 2D). The  $\text{IC}_{50}$  values ( $\mu\text{M}$ ) of the  $\epsilon 2/\zeta 1$  channel for fentanyl, codeine, and naloxone were  $192 \pm 9$  ( $n = 8$ ),  $613 \pm 25$  ( $n = 7$ ), and  $503 \pm 34$  ( $n = 8$ ), respectively.



## CHANNEL BLOCK OF NMDA RECEPTORS BY OPIOIDS

### Effects of Opioids on the Dose-Response Relationships of the NMDA Receptor Channel with Agonists

To characterize the inhibitory effects of opioids on NMDA receptor channels, we examined whether opioids affect the apparent affinities of the  $\epsilon/2/\zeta 1$  channel for L-glutamate and glycine before and during perfusion of 300  $\mu\text{M}$  meperidine were analyzed (fig. 3A). Meperidine effectively suppressed the maximal current responses to saturating concentrations of both L-glutamate and glycine. The  $\text{EC}_{50}$  values ( $\mu\text{M}$ ) of the  $\epsilon/2/\zeta 1$  channel for L-glutamate in the presence of 10  $\mu\text{M}$  glycine and those for glycine in the presence of 10  $\mu\text{M}$  L-glutamate during perfusion of 300  $\mu\text{M}$  meperidine ( $1.04 \pm 0.04$  [ $n = 7$ ] and  $0.29 \pm 0.01$  [ $n = 6$ ], respectively) were not significantly different from those before meperidine perfusion ( $1.03 \pm 0.02$  [ $n = 6$ ] and  $0.29 \pm 0.01$  [ $n = 6$ ], respectively) (log[ $\text{EC}_{50}$ ] values were compared by  $t$  tests;  $P > 0.76$  for L-glutamate and  $P > 0.81$  for glycine). Similarly, morphine (300  $\mu\text{M}$ ) inhibited the maximal current responses of the  $\epsilon/2/\zeta 1$  channel without affecting the  $\text{EC}_{50}$  values (fig. 3B). These results suggest the non-competitive antagonism of NMDA receptor channels by opioids.

### Effects of the Membrane Potential on Opioid Inhibition

To test whether the inhibition by opioids is voltage-dependent, the extent of inhibition was measured at different holding potentials. Figure 4A shows current-voltage relationships of the  $\epsilon/2/\zeta 1$  channel before and during perfusion of 300  $\mu\text{M}$  meperidine. Meperidine inhibition of the  $\epsilon/2/\zeta 1$  channel exhibited voltage dependence and was quite effective at hyperpolarized potentials. The extent of inhibition was significantly dependent on the membrane potential (ANOVA,  $P < 0.0001$ ). At a membrane potential of  $-110$  mV, meperidine (300  $\mu\text{M}$ ) reduced the current responses of the  $\epsilon/2/\zeta 1$  channel to  $17 \pm 1\%$  ( $n = 7$ ) of the control responses, whereas at  $-10$  mV membrane potential, meperidine reduced the current responses to only  $85 \pm 2\%$  ( $n = 7$ ). Similarly, morphine (300  $\mu\text{M}$ ) inhibited the  $\epsilon/2/\zeta 1$  channel in a voltage-dependent manner (fig. 4B). The degree of voltage dependence of inhibition of the  $\epsilon/2/\zeta 1$  channel by meperidine (300  $\mu\text{M}$ ), morphine (300  $\mu\text{M}$ ), and naloxone (1  $\mu\text{M}$ ) was compared using the Woodhull model<sup>21</sup> (fig. 4C). Although the  $K_{d(o)}$  values (the affinity of binding) for meperidine, morphine, and naloxone varied ( $2.6 \pm 0.5$  [ $n = 7$ ],  $3.8 \pm 0.5$  [ $n = 8$ ],

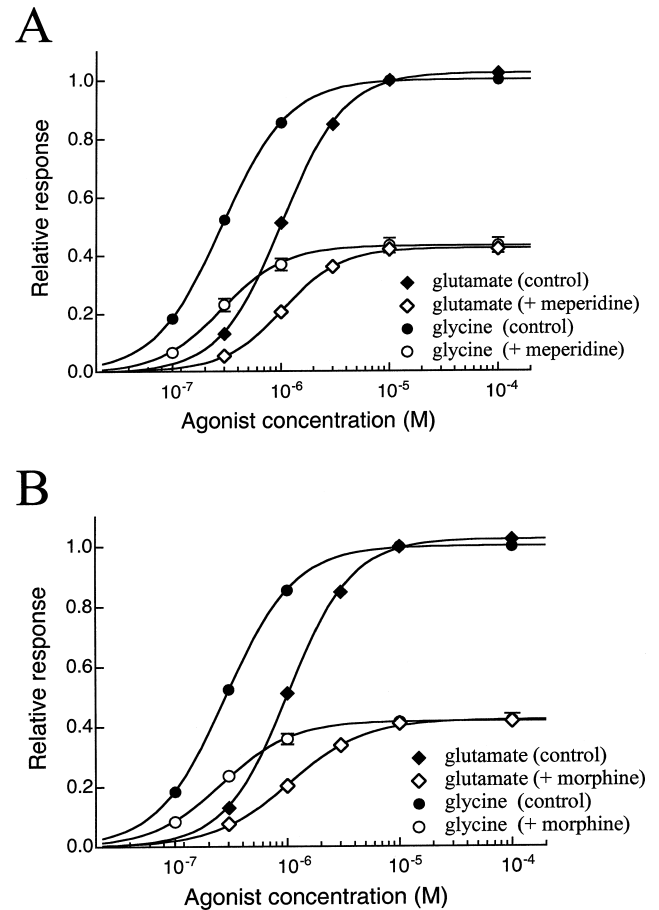

**Fig. 3.** The effects of opioids on the dose-response relationships of the  $\epsilon/2/\zeta 1$  channel for L-glutamate and glycine. (A) Dose-response relationships of the  $\epsilon/2/\zeta 1$  channel for L-glutamate in the presence of 10  $\mu\text{M}$  glycine and those for glycine in the presence of 10  $\mu\text{M}$  L-glutamate before and during perfusion of 300  $\mu\text{M}$  meperidine. The measured current responses were normalized to the control current responses to 10  $\mu\text{M}$  L-glutamate plus 10  $\mu\text{M}$  glycine. The  $\text{EC}_{50}$  values ( $\mu\text{M}$ ) of the  $\epsilon/2/\zeta 1$  channel for L-glutamate before and during perfusion of 300  $\mu\text{M}$  meperidine were  $1.03 \pm 0.02$  and  $1.04 \pm 0.04$ , respectively, and the Hill coefficient values for those were  $1.53 \pm 0.04$  and  $1.62 \pm 0.10$ , respectively ( $n = 6$  or  $7$ ). The  $\text{EC}_{50}$  values ( $\mu\text{M}$ ) of the  $\epsilon/2/\zeta 1$  channel for glycine before and during perfusion of 300  $\mu\text{M}$  meperidine were  $0.29 \pm 0.01$  and  $0.29 \pm 0.01$ , respectively, and the Hill coefficient values for those were  $1.42 \pm 0.05$  and  $1.56 \pm 0.07$ , respectively ( $n = 6$  or  $7$ ). (B) Dose-response relationships of the  $\epsilon/2/\zeta 1$  channel for L-glutamate in the presence of 10  $\mu\text{M}$  glycine and those for glycine in the presence of 10  $\mu\text{M}$  L-glutamate before and during perfusion of 300  $\mu\text{M}$  morphine. The  $\text{EC}_{50}$  values ( $\mu\text{M}$ ) of the  $\epsilon/2/\zeta 1$  channel for L-glutamate and glycine during perfusion of 300  $\mu\text{M}$  morphine were  $1.05 \pm 0.03$  and  $0.26 \pm 0.02$ , respectively, and the Hill coefficient values for those were  $1.38 \pm 0.05$  and  $1.44 \pm 0.09$ , respectively ( $n = 6$  or  $7$ ).

and  $10.7 \pm 1.6$  [ $n = 8$ ] mM, respectively; ANOVA,  $P < 0.0001$ ), the  $z\delta$  values (the degree of voltage dependence of block) for those were not significantly different

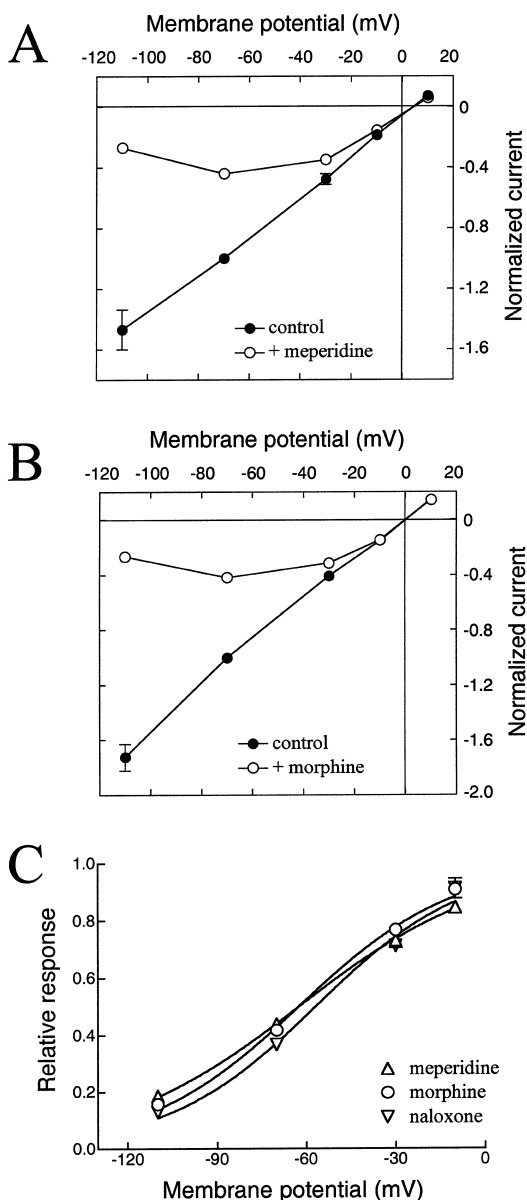

**Fig. 4.** The effects of the membrane potential on the extent of opioid inhibition. (A) The current-voltage relationships of the  $\epsilon 2/\zeta 1$  channel before and during perfusion of 300  $\mu\text{M}$  meperidine. The measured current responses were normalized to the control current responses at  $-70$  mV before meperidine perfusion ( $n = 7$  or 8). (B) The current-voltage relationships of the  $\epsilon 2/\zeta 1$  channel before and during perfusion of 300  $\mu\text{M}$  morphine ( $n = 7$  or 8). (C) The effects of the membrane potential on the extent of inhibition of the  $\epsilon 2/\zeta 1$  channel by 300  $\mu\text{M}$  meperidine, 300  $\mu\text{M}$  morphine, and 1 mM naloxone. The  $K_{d(0)}$  values (mM) for meperidine, morphine, and naloxone were  $2.6 \pm 0.5$ ,  $3.8 \pm 0.5$ , and  $10.7 \pm 1.6$ , respectively, and the  $z\delta$  values for those were  $0.9 \pm 0.05$ ,  $1.0 \pm 0.04$ , and  $1.0 \pm 0.06$ , respectively ( $n = 7$  or 8).

( $0.9 \pm 0.05$  [ $n = 7$ ],  $1.0 \pm 0.04$  [ $n = 8$ ], and  $1.0 \pm 0.06$  [ $n = 8$ ], respectively; ANOVA,  $P > 0.07$ ).

#### *Effects of Opioids on the Sensitivities to $\text{Mg}^{2+}$ Block*

To determine whether opioids interact with the  $\text{Mg}^{2+}$  block site of NMDA receptor channels, we examined the effects of meperidine (300  $\mu\text{M}$ ) and morphine (300  $\mu\text{M}$ ) on the sensitivity of the  $\epsilon 2/\zeta 1$  channel to the  $\text{Mg}^{2+}$  block (fig. 5A).  $\text{Mg}^{2+}$  inhibited the current responses of the  $\epsilon 2/\zeta 1$  channel in a dose-dependent manner with  $\text{IC}_{50}$  values of  $15.5 \pm 1.0$   $\mu\text{M}$  ( $n = 8$ ). Meperidine and morphine shifted the inhibition curve of  $\text{Mg}^{2+}$  to the right (fig. 5B). The  $\text{IC}_{50}$  values ( $\mu\text{M}$ ) for  $\text{Mg}^{2+}$  during perfusion of meperidine and morphine were  $30.0 \pm 1.9$  ( $n = 7$ ) and  $37.0 \pm 2.5$  ( $n = 7$ ), respectively, which were significantly higher than those for  $\text{Mg}^{2+}$  alone (log[ $\text{IC}_{50}$ ] values were compared using ANOVA followed by Scheffé's multiple comparison tests,  $P < 0.0001$  for control versus meperidine, and control versus morphine).

#### *Effects of Point Mutations on Inhibition by Opioids*

Opioids inhibited the current responses of the NMDA receptor channel in a voltage-dependent manner. The voltage-dependent inhibition is a specific and essential property of the well-characterized NMDA receptor channel blockers, such as  $\text{Mg}^{2+}$  and dissociative anesthetics (phencyclidine [PCP], ketamine, and (+)MK-801).<sup>22,23</sup> Furthermore, the  $\text{Mg}^{2+}$  block curve was shifted rightward by opioids. These results suggest that inhibition of NMDA receptor channels by opioids may be a result of channel block mechanisms. We have previously shown that the conserved asparagine residue in the channel-lining segment M2 of the  $\epsilon 2$  and  $\zeta 1$  subunits (the asparagine 589 of the  $\epsilon 2$  subunit and the asparagine 598 of the  $\zeta 1$  subunits) constitutes the  $\text{Mg}^{2+}$  block site of NMDA receptor channels, and that the noncompetitive antagonists, PCP, ketamine, *n*-allylnormetazocine (SKF-10,047), and (+)MK-801, also act on the  $\text{Mg}^{2+}$  block site.<sup>11,13</sup> To reveal whether the same asparagine residue also constitutes the block site of opioids, we examined the effects of replacement by glutamine of the conserved asparagine residue in segment M2 of the  $\epsilon 2$  and  $\zeta 1$  subunits (the mutations  $\epsilon 2\text{-N589Q}$  and  $\zeta 1\text{-N598Q}$ , respectively) on the sensitivity to opioids. The mutation  $\zeta 1\text{-N598Q}$  reduced the sensitivity to meperidine (fig. 6A). The  $\epsilon 2/\zeta 1\text{-N598Q}$  and  $\epsilon 2\text{-N589Q}/\zeta 1\text{-N598Q}$  channels were more resistant to meperidine than the  $\epsilon 2/\zeta 1$  and  $\epsilon 2\text{-N589Q}/\zeta 1$  channels (log[ $\text{IC}_{50}$ ] values were compared by ANOVA followed by Scheffé's multiple comparison tests,  $P < 0.0001$ ) (fig. 6B). On the other hand, the sensitivity of

## CHANNEL BLOCK OF NMDA RECEPTORS BY OPIOIDS

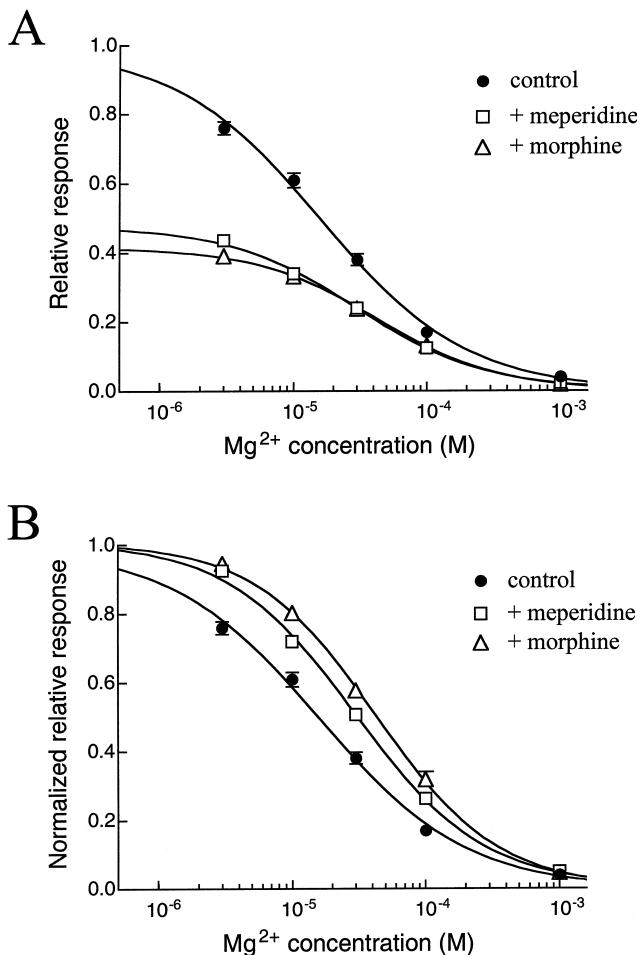

**Fig. 5.** The effects of meperidine and morphine on the sensitivity to the  $Mg^{2+}$  block. (A) The dose-inhibition relationships of the  $\epsilon 2/\zeta 1$  channel for  $Mg^{2+}$  before and during perfusion of meperidine ( $300 \mu M$ ) and morphine ( $300 \mu M$ ). (B) The normalized dose-inhibition relationships of the  $\epsilon 2/\zeta 1$  channel for  $Mg^{2+}$ . The measured current responses during perfusion of opioids and  $Mg^{2+}$  were normalized to the current responses in the absence of  $Mg^{2+}$  during opioid perfusion. The  $IC_{50}$  values ( $\mu M$ ) of the  $\epsilon 2/\zeta 1$  channel for  $Mg^{2+}$  before, and during perfusion of meperidine and morphine were  $15.5 \pm 1.0$ ,  $30.0 \pm 1.9$ , and  $37.0 \pm 2.5$ , respectively, and the Hill coefficient values for those were  $0.81 \pm 0.06$ ,  $0.89 \pm 0.03$ , and  $1.05 \pm 0.04$ , respectively ( $n = 7$  or  $8$ ).

the  $\epsilon 2$ -N589Q/ $\zeta 1$  channel was not significantly different from that of the  $\epsilon 2/\zeta 1$  channel (Scheffé's multiple comparison tests,  $P > 0.99$ ). The  $IC_{50}$  values ( $\mu M$ ) of the  $\epsilon 2/\zeta 1$ ,  $\epsilon 2$ -N589Q/ $\zeta 1$ ,  $\epsilon 2/\zeta 1$ -N598Q, and  $\epsilon 2$ -N589Q/ $\zeta 1$ -N598Q channels for meperidine were  $206 \pm 7$  ( $n = 7$ ),  $212 \pm 16$  ( $n = 6$ ),  $1926 \pm 83$  ( $n = 6$ ), and  $2194 \pm 86$  ( $n = 6$ ), respectively. Similarly, the mutation  $\zeta 1$ -N598Q reduced the sensitivity of the  $\epsilon 2/\zeta 1$  channel to morphine and naloxone, whereas the effects of the mutation  $\epsilon 2$ -

N589Q were only slight (figs. 6C and 6D). The involvement of the asparagine residue of the  $\zeta 1$  subunit in determining the opioid sensitivity was further confirmed by the resistance of the  $\epsilon 1/\zeta 1$ -N598Q channel to opioids (data not shown).

The effects of the mutation  $\zeta 1$ -N598Q on the degree of voltage dependence of block by morphine were examined. The inhibitory effects of morphine ( $300 \mu M$ ) on the  $\epsilon 2/\zeta 1$ -N598Q channel were slight but exhibited voltage dependence (ANOVA,  $P < 0.0001$ ) (fig. 7A). The degree of voltage dependence of block by morphine ( $300 \mu M$ ) was compared between the  $\epsilon 2/\zeta 1$  and  $\epsilon 2/\zeta 1$ -N598Q channels using the Woodhull model (fig. 7B).<sup>21</sup> Not only were the  $K_{d(o)}$  values (the affinity of binding) for morphine different between the  $\epsilon 2/\zeta 1$  and  $\epsilon 2/\zeta 1$ -N598Q channels ( $3.8 \pm 0.5$  [ $n = 8$ ] and  $6.5 \pm 1.0$  [ $n = 6$ ] mM, respectively;  $t$ -tests,  $P < 0.03$ ), but the  $z\delta$  values (the degree of voltage dependence of block) of the  $\epsilon 2/\zeta 1$  and  $\epsilon 2/\zeta 1$ -N598Q channels were also significantly different ( $1.0 \pm 0.04$  [ $n = 8$ ] and  $0.6 \pm 0.06$  [ $n = 6$ ], respectively;  $t$  tests,  $P < 0.0001$ ).

## Discussion

In the present investigation, we have shown that high concentrations of the naturally occurring opioids morphine and codeine, the phenylpiperidine derivatives meperidine and fentanyl, and the opioid antagonist naloxone inhibit NMDA receptor channels. These results are consistent with previous studies that found that high concentrations of opioids and naloxone protect neurons against central nervous system ischemia and injury and NMDA-induced neurotoxicity.<sup>1-3</sup> Recent electrophysiologic and receptor binding studies showed that some opioid agonists, such as meperidine, methadone, and ketobemidone, reduce NMDA-induced depolarization in rat-brain slice preparations at concentrations of 1 mM, and inhibit [ $^3H$ ]MK-801 binding in rat cortical and forebrain membranes.<sup>4-6</sup> Furthermore, there are some opioid-related compounds that are already known to be noncompetitive NMDA receptor antagonists. The benzomorphans SKF-10,047 and cyclazocine were shown to exhibit NMDA receptor antagonist properties.<sup>24,25</sup> The morphinan opioid levorphanol, its dextrorotatory non-opioid enantiomer dextrorphan, and its *O*-methyl derivative, dextromethorphan, were also able to selectively antagonize the NMDA-induced neuroexcitation.<sup>26,27</sup> These findings suggest that the NMDA receptor antagonist property is a common characteristic of various opioids and related compounds.

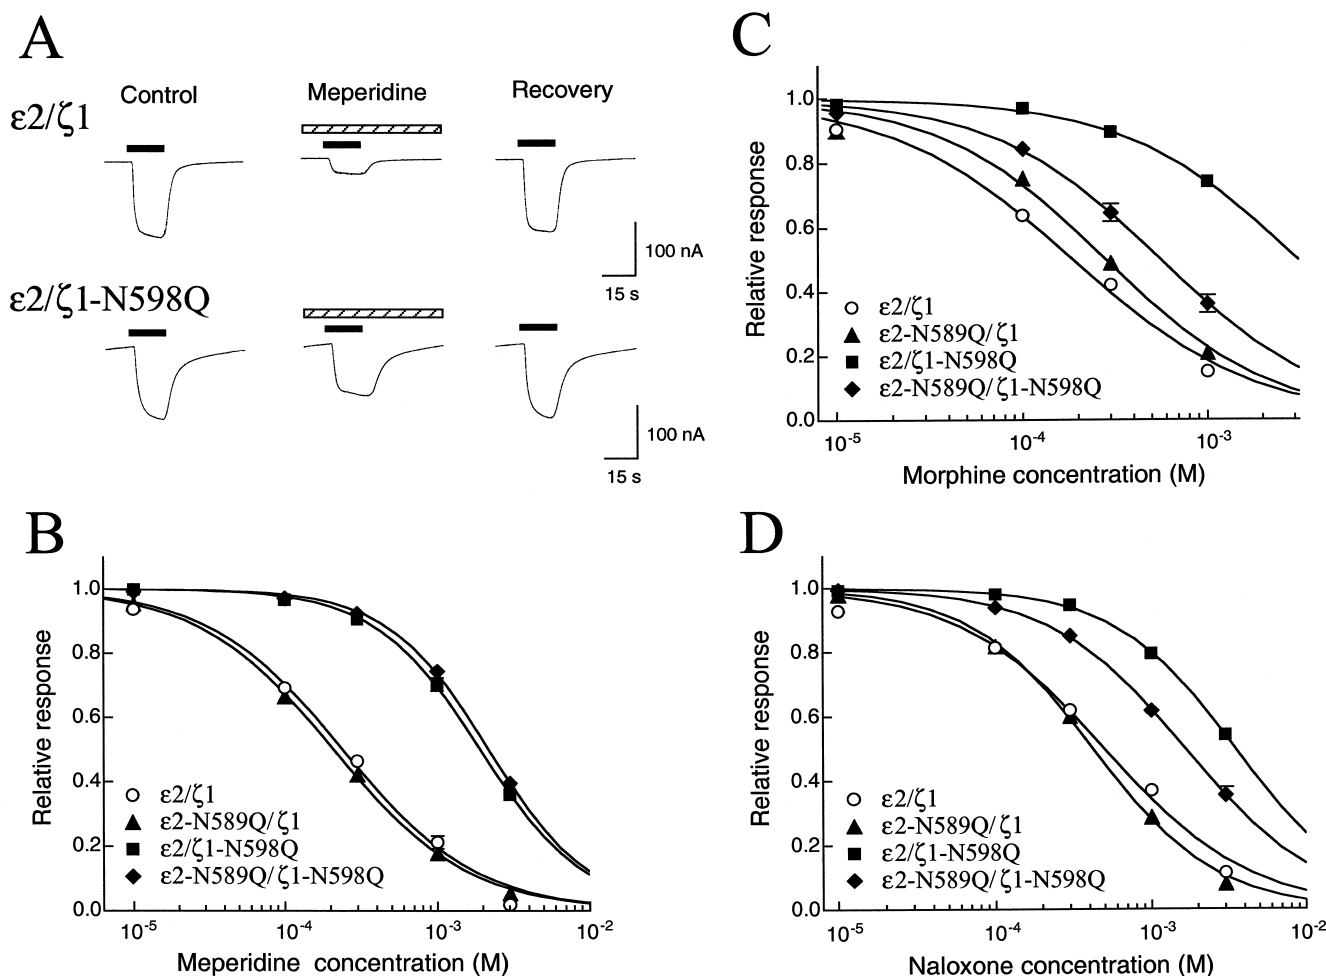

Fig. 6. The effects of substitution mutations on the opioid sensitivity. (A) The current responses of the  $\epsilon 2/\zeta 1$  and  $\epsilon 2/\zeta 1$ -N598Q channels before (left), during (middle), and after (right) perfusion of 1 mM meperidine. (B) The dose-inhibition relationships for meperidine of the  $\epsilon 2/\zeta 1$ ,  $\epsilon 2$ -N589Q/ $\zeta 1$ ,  $\epsilon 2/\zeta 1$ -N598Q, and  $\epsilon 2$ -N589Q/ $\zeta 1$ -N598Q channels. The  $IC_{50}$  values ( $\mu M$ ) of the  $\epsilon 2/\zeta 1$ ,  $\epsilon 2$ -N589Q/ $\zeta 1$ ,  $\epsilon 2/\zeta 1$ -N598Q, and  $\epsilon 2$ -N589Q/ $\zeta 1$ -N598Q channels for meperidine were  $206 \pm 7$ ,  $212 \pm 16$ ,  $1926 \pm 83$ , and  $2194 \pm 86$ , respectively, and the Hill coefficient values of those were  $0.99 \pm 0.03$ ,  $1.00 \pm 0.04$ ,  $1.29 \pm 0.09$ , and  $1.31 \pm 0.04$ , respectively ( $n = 6$  or  $7$ ). (C) The dose-inhibition relationships for morphine of the  $\epsilon 2/\zeta 1$ ,  $\epsilon 2$ -N589Q/ $\zeta 1$ ,  $\epsilon 2/\zeta 1$ -N598Q, and  $\epsilon 2$ -N589Q/ $\zeta 1$ -N598Q channels. The  $IC_{50}$  values ( $\mu M$ ) of the  $\epsilon 2/\zeta 1$ ,  $\epsilon 2$ -N589Q/ $\zeta 1$ ,  $\epsilon 2/\zeta 1$ -N598Q, and  $\epsilon 2$ -N589Q/ $\zeta 1$ -N598Q channels for morphine were  $187 \pm 9$ ,  $285 \pm 24$ ,  $4626 \pm 1920$ , and  $580 \pm 67$ , respectively, and the Hill coefficient values of those were  $0.90 \pm 0.05$ ,  $0.96 \pm 0.03$ ,  $0.98 \pm 0.11$ , and  $0.98 \pm 0.03$ , respectively ( $n = 7$ ). (D) The dose-inhibition relationships for naloxone of the  $\epsilon 2/\zeta 1$ ,  $\epsilon 2$ -N589Q/ $\zeta 1$ ,  $\epsilon 2/\zeta 1$ -N598Q, and  $\epsilon 2$ -N589Q/ $\zeta 1$ -N598Q channels. The  $IC_{50}$  values ( $\mu M$ ) of the  $\epsilon 2/\zeta 1$ ,  $\epsilon 2$ -N589Q/ $\zeta 1$ ,  $\epsilon 2/\zeta 1$ -N598Q, and  $\epsilon 2$ -N589Q/ $\zeta 1$ -N598Q channels for naloxone were  $503 \pm 34$ ,  $426 \pm 31$ ,  $3474 \pm 175$ , and  $1675 \pm 152$ , respectively, and the Hill coefficient values of those were  $0.95 \pm 0.02$ ,  $1.11 \pm 0.02$ ,  $1.14 \pm 0.06$ , and  $1.01 \pm 0.02$ , respectively ( $n = 7$  or  $8$ ). The control current responses (nA) of the  $\epsilon 2/\zeta 1$ ,  $\epsilon 2$ -N589Q/ $\zeta 1$ ,  $\epsilon 2/\zeta 1$ -N598Q, and  $\epsilon 2$ -N589Q/ $\zeta 1$ -N598Q channels obtained before perfusion of opioids were 160–890, 180–540, 140–460, and 180–690, respectively.

The NMDA receptor antagonist activity of opioids should be noted because NMDA receptor channels are suggested to be involved in the changing of opioid efficacy in certain clinical situations. In the pain hypersensitivity states in which opioids are not effective, the coadministration of an NMDA receptor antagonist with opioids was shown to restore the antinociceptive effects

of opioids.<sup>28,29</sup> Furthermore, NMDA receptor antagonists were shown to attenuate or block the development of opioid tolerance and dependence in case of repeated treatment.<sup>30,31</sup> Therefore, opioids with NMDA receptor antagonist activities may extend the usefulness of opioids in the clinical management of pain. However, the opioids tested in the present investigation could only



## CHANNEL BLOCK OF NMDA RECEPTORS BY OPIOIDS

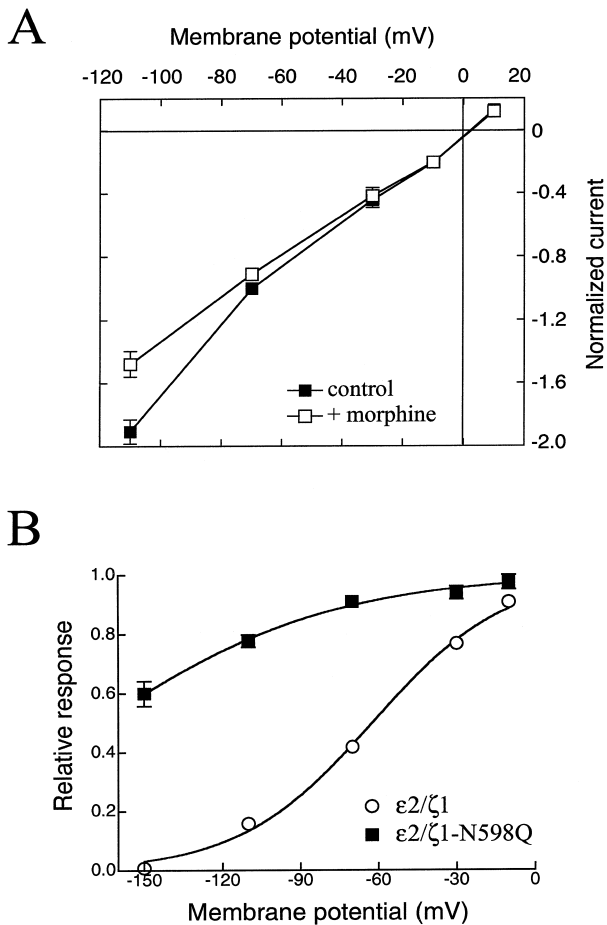

Fig. 7. The effects of the mutation  $\zeta 1$ -N598Q on the voltage dependence of block by morphine. (A) The current-voltage relationships of the  $\epsilon 2/\zeta 1$ -N598Q channel before and during perfusion of  $300 \mu\text{M}$  morphine. The measured current responses were normalized to the control current responses at  $-70 \text{ mV}$  before morphine perfusion ( $n = 6$ ). (B) The effects of the membrane potential on the extent of inhibition of the  $\epsilon 2/\zeta 1$  and  $\epsilon 2/\zeta 1$ -N598Q channels by  $300 \mu\text{M}$  morphine. The  $K_{d(o)}$  values (mM) for morphine of the  $\epsilon 2/\zeta 1$  and  $\epsilon 2/\zeta 1$ -N598Q channels were  $3.8 \pm 0.5$  and  $6.5 \pm 1.0$ , respectively, and the  $z\delta$  values of those were  $1.0 \pm 0.04$  and  $0.6 \pm 0.06$ , respectively ( $n = 6-8$ ).

block NMDA receptor channels at high micromolar concentrations. Plasma concentrations obtained after systemic administration of meperidine and morphine are at most  $1-3 \mu\text{M}$ ,<sup>32,33</sup> and those of fentanyl during high-dose fentanyl anesthesia for cardiac surgery are around  $0.1 \mu\text{M}$ .<sup>34,35</sup> On the other hand, very high concentrations are obtained in the cerebrospinal fluid (CSF) after epidural or intrathecal administration of opioids in humans. Meperidine concentrations in the CSF after intrathecal injection reach  $300-1000 \mu\text{M}$ , and those after epidural administration come to approximately  $100-300 \mu\text{M}$  be-

cause of the rapid absorption across the dural membrane into the CSF.<sup>36,37</sup> The initial CSF concentrations of morphine following intrathecal administration are in the high micromolar range, and those after epidural administration are about  $10 \mu\text{M}$ ,<sup>38,39</sup> the CSF concentrations of fentanyl after epidural administration are at most  $0.1 \mu\text{M}$ .<sup>40</sup> Thus, the NMDA receptor antagonist property may be clinically significant in the spinal cord following epidural or intrathecal administration of some opioids. Among known opioids with NMDA receptor antagonist properties, methadone and its *d*- and *l*-isomers were reported to exhibit relatively high affinities for NMDA receptor channels, approximately similar to those of dextromethorphan.<sup>4,6</sup> In the rat formalin test, intrathecal administration of the nonopioid *d*-methadone was shown to have antinociceptive effects as a result of its NMDA receptor antagonist activity.<sup>41</sup>

We have previously shown that the conserved asparagine residue in channel-lining segment M2 of the  $\epsilon 2$  and  $\zeta 1$  subunits constitutes the  $\text{Mg}^{2+}$  block site of NMDA receptor channels, and that PCP, ketamine, SKF-10,047 and (+)MK-801 also act on the  $\text{Mg}^{2+}$  block site.<sup>11,13</sup> The effects of mutations on the sensitivity to ketamine were stronger for the  $\zeta 1$  subunit than for the  $\epsilon 2$  subunit, whereas mutations in both subunits are required for (+)MK-801 resistance.<sup>11,13</sup> In the present investigation, the mutation  $\zeta 1$ -N598Q reduced the sensitivity and voltage dependence of opioid inhibition of the  $\epsilon 2/\zeta 1$  channel, whereas the mutation  $\epsilon 2$ -N589Q barely affected the sensitivity to opioids. These results support the proposition that the block site of opioids may at least partially overlap with those of the established channel blockers. Furthermore, opioids appear to resemble ketamine rather than (+)MK-801 in terms of the contribution of the conserved asparagine residue of the  $\zeta 1$  subunit to the block site.

The findings that various opioids and related compounds block NMDA receptor channels raise the question as to which chemical structures of these compounds are responsible for the NMDA receptor channel blocking. Studies on the structural requirements for binding at the PCP site of NMDA receptor channels by analyses of PCP derivatives and (+)MK-801-like molecules have proposed two main requirements of molecules, which correspond to a hydrophobic aromatic moiety and a basic nitrogen atom.<sup>42,43</sup> Various opioid compounds including both naturally occurring opioids and synthetic compounds such as morphinans, benzomorphans, and phenylpiperidine derivatives, which at first glance seem to be structurally diverse, have a com-

mon vital moiety: an aromatic ring and a nitrogen atom that usually originates from a piperidine ring.<sup>44</sup> Thus, the aromatic ring and the protonated amine of opioid compounds may interact with structural determinants for the PCP binding site of NMDA receptor channels through the hydrophobic interaction and the hydrogen bond, respectively. This proposition is supported by recent structural analyses of the PCP site, which demonstrated that the morphinan derivative dextromethorphan is able to occupy the binding site in a fashion similar to PCP, with its aromatic ring roughly occupying the same region as the phenyl moiety of PCP.<sup>43</sup>

In the present investigation, the effects of opioids on NMDA receptor channels were fully established by the second application of agonists during continuous perfusion of opioids. After opioids were washed out, application of agonists two or three times fully recovered the current responses. This observation is in contrast to that of the potent channel blocker (+)MK-801, which exhibits the progressive and almost irreversible block by sequential application of agonists.<sup>13</sup> The NMDA receptor channel blocking and unblocking kinetics of various noncompetitive antagonists were reported to be highly correlated to their affinities: Lower potency antagonists exhibited faster onset and offset kinetics.<sup>45</sup> Thus, the fast onset and recovery of the block by opioids may be caused by their low affinities for NMDA receptor channels.

Electrophysiologic studies showed that 1 mM meperidine reduced NMDA responses in the rat neonatal spinal cord, whereas meperidine was devoid of antagonist activity in the cerebral cortex.<sup>4</sup> Because the distribution of the four  $\epsilon$  subunits is distinct in the mature and developing brain,<sup>7</sup> reported differences in meperidine sensitivities in different central nervous system regions seem to be related to differences in the  $\epsilon$  subunits. In the present investigation, however, meperidine inhibited the  $\epsilon 1/\zeta 1$ ,  $\epsilon 2/\zeta 1$ ,  $\epsilon 3/\zeta 1$ , and  $\epsilon 4/\zeta 1$  channels to a similar extent. Thus, differences in meperidine sensitivities of NMDA receptor channels in different central nervous system regions cannot be explained only by differences in  $\epsilon$  subunit species. If the subunit composition of NMDA receptor channels were responsible, differences in a stoichiometry of the  $\zeta 1$  subunit might be involved.

In conclusion, high concentrations of various opioid compounds inhibited the current responses of heteromeric NMDA receptor channels in a voltage-dependent manner. The conserved asparagine residue in segment M2 of the  $\zeta 1$  subunit was identified as one of molecular determinants of the opioid binding site at NMDA recep-

tor channels. These results suggest that the low-affinity NMDA receptor antagonist activity is not a property specific for a part of opioids as previously considered, but a common characteristic of various opioid compounds. Furthermore, the inhibition was confirmed to be a result of channel block mechanisms at the site, which partially overlaps with those of  $Mg^{2+}$  and ketamine. Our results point out the clinical significance of the NMDA receptor antagonist property of some opioids in the spinal cord after local administration and may yield insights into the design of new opioid compounds with higher affinities for NMDA receptor channels.

The authors thank Sankyo Co. Ltd., Tokyo, Japan, for providing fentanyl citrate.

## References

1. Faden AI, Jacobs TP, Holaday JW: Opiate antagonist improves neurologic recovery after spinal injury. *Science* 1981; 211:493-4
2. Kim JP, Goldberg MP, Choi DW: High concentrations of naloxone attenuate *N*-methyl-D-aspartate receptor-mediated neurotoxicity. *Eur J Pharmacol* 1987; 138:133-6
3. Choi DW, Viseskul V: Opioids and non-opioid enantiomers selectively attenuate *N*-methyl-D-aspartate neurotoxicity on cortical neurons. *Eur J Pharmacol* 1988; 155:27-35
4. Ebert B, Andersen S, Krosgaard-Larsen P: Ketobemidone, methadone and pethidine are non-competitive *N*-methyl-D-aspartate (NMDA) antagonists in the rat cortex and spinal cord. *Neurosci Lett* 1995; 187:165-8
5. Andersen S, Dickenson AH, Kohn M, Reeve A, Rahman W, Ebert B: The opioid ketobemidone has a NMDA blocking effect. *Pain* 1996; 67:369-74
6. Gorman AL, Elliott KJ, Inturrisi CE: The *d*- and *l*-isomers of methadone bind to the non-competitive site on the *N*-methyl-D-aspartate (NMDA) receptor in rat forebrain and spinal cord. *Neurosci Lett* 1997; 223:5-8
7. Mori H, Mishina M: Structure and function of the NMDA receptor channel. *Neuropharmacology* 1995; 34:1219-37
8. Watanabe M, Mishina M, Inoue Y: Distinct spatiotemporal distributions of the *N*-methyl-D-aspartate receptor channel subunit mRNAs in the mouse cervical cord. *J Comp Neurol* 1994; 345:314-9
9. Tölle TR, Berthele A, Zieglansberger W, Seeburg PH, Wisden W: The differential expression of 16 NMDA and non-NMDA receptor subunits in the rat spinal cord and in periaqueductal gray. *J Neurosci* 1993; 13:5009-28
10. Burnashev N, Schoepfer R, Monyer H, Ruppersberg JP, Günther W, Seeburg PH, Sakmann B: Control by asparagine residues of calcium permeability and magnesium blockade in the NMDA receptor. *Science* 1992; 257:1415-9
11. Mori H, Masaki H, Yamakura T, Mishina M: Identification by mutagenesis of a  $Mg^{2+}$ -block site of the NMDA receptor channel. *Nature* 1992; 358:673-5
12. Hume RI, Dingledine R, Heinemann SF: Identification of a site in glutamate receptor subunits that controls calcium permeability. *Science* 1991; 253:1028-31

## CHANNEL BLOCK OF NMDA RECEPTORS BY OPIOIDS

13. Yamakura T, Mori H, Masaki H, Shimoji K, Mishina M: Different sensitivities of NMDA receptor channel subtypes to non-competitive antagonists. *NeuroReport* 1993; 4:687-90
14. Yamakura T, Mori H, Shimoji K, Mishina M: Phosphorylation of the carboxyl-terminal domain of the  $\zeta 1$  subunit is not responsible for potentiation by TPA of the NMDA receptor channel. *Biochem Biophys Res Commun* 1993; 196:1537-44
15. Mori H, Yamakura T, Masaki H, Mishina M: Involvement of the carboxyl-terminal region in modulation by TPA of the NMDA receptor channel. *NeuroReport* 1993; 4:519-22
16. Ikeda K, Nagasawa M, Mori H, Araki K, Sakimura K, Watanabe M, Inoue Y, Mishina M: Cloning and expression of the  $\epsilon 4$  subunit of the NMDA receptor channel. *FEBS Lett* 1992; 313:34-8
17. Kutsuwada T, Kashiwabuchi N, Mori H, Sakimura K, Kushiya E, Araki K, Meguro H, Masaki H, Kumanishi T, Arakawa M, Mishina M: Molecular diversity of the NMDA receptor channel. *Nature* 1992; 358:36-41
18. Yamazaki M, Mori H, Araki K, Mori KJ, Mishina M: Cloning, expression and modulation of a mouse NMDA receptor subunit. *FEBS Lett* 1992; 300:39-45
19. Sakimura K, Bujo H, Kushiya E, Araki K, Yamazaki M, Yamazaki M, Meguro H, Warashina A, Numa S, Mishina M: Functional expression from cloned cDNAs of glutamate receptor species responsive to kainate and quisqualate. *FEBS Lett* 1990; 272:73-80
20. Leonard JP, Kelso SR: Apparent desensitization of NMDA responses in *Xenopus* oocytes involves calcium-dependent chloride current. *Neuron* 1990; 4:53-60
21. Woodhull AM: Ionic blockage of sodium channels in nerve. *J Gen Physiol* 1973; 61:687-708
22. Mayer ML, Westbrook GL, Guthrie PB: Voltage-dependent block by  $Mg^{2+}$  of NMDA responses in spinal cord neurones. *Nature* 1984; 309:261-3
23. Honey CR, Miljkovic Z, MacDonald JF: Ketamine and phencyclidine cause a voltage-dependent block of responses to L-aspartic acid. *Neurosci Lett* 1985; 61:135-9
24. Anis NA, Berry SC, Burton NR, Lodge D: Cyclazocine, like ketamine, blocks *N*-methylaspartate actions on spinal neurones in cat and rat. *J Physiol* 1983; 338:37-8P
25. Berry SC, Dawkins SL, Lodge D: Comparison of  $\sigma$ - and  $\kappa$ -opioid receptor ligands as excitatory amino acid antagonists. *Br J Pharmacol* 1984; 83:179-85
26. Church J, Lodge D, Berry SC: Differential effects of dextrorphan and levorphanol on the excitation of rat spinal neurones by amino acids. *Eur J Pharmacol* 1985; 111:185-90
27. Wong BY, Coulter DA, Choi DW, Prince DA: Dextrorphan and dextromethorphan, common antitussives, are antiepileptic and antagonize *N*-methyl-D-aspartate in brain slices. *Neurosci Lett* 1988; 85:261-6
28. Yamamoto T, Yaksh TL: Studies on the spinal interaction of morphine and the NMDA antagonist MK-801 on the hyperesthesia observed in a rat model of sciatic mononeuropathy. *Neurosci Lett* 1992; 135:67-70
29. Chapman V, Dickenson AH: The combination of NMDA antagonism and morphine produces profound antinociception in the rat dorsal horn. *Brain Res* 1992; 573:321-3
30. Trujillo KA, Akil H: Inhibition of morphine tolerance and dependence by the NMDA receptor antagonist MK-801. *Science* 1991; 251:85-7
31. Elliot K, Minami N, Kolesnikov YA, Pasternak GW, Inturrisi CE: The NMDA receptor antagonists, LY274614 and MK-801, and the nitric oxide synthase inhibitor, NG-nitro-L-arginine, attenuate analgesic tolerance to the mu-opioid morphine but not to kappa opioids. *Pain* 1994; 56:69-75
32. Austin KL, Stapleton JV, Mather LE: Relationship between blood meperidine concentrations and analgesic response: A preliminary report. *ANESTHESIOLOGY* 1980; 53:460-6
33. Neumann PB, Henriksen H, Grosman N, Christensen CB: Plasma morphine concentrations during chronic oral administration in patients with cancer pain. *Pain* 1982; 13:247-52
34. Thomson IR, Bergstrom RG, Rosenbloom M, Meatherall RC: Premedication and high-dose fentanyl anesthesia for myocardial revascularization: A comparison of lorazepam versus morphine-scopolamine. *ANESTHESIOLOGY* 1988; 68:194-200
35. Koren G, Goresky G, Crean P, Klein J, MacLeod SM: Pediatric fentanyl dosing based on pharmacokinetics during cardiac surgery. *Anesth Analg* 1984; 63:577-82
36. Glynn CJ, Mather LE, Cousins MJ, Graham JR, Wilson PR: Peridural meperidine in humans: Analgesic response, pharmacokinetics, and transmission into CSF. *ANESTHESIOLOGY* 1981; 55:520-6
37. Nordberg G, Hansdotter V, Bondesson U, Boreus LO, Mellstrand T, Hedner T: CSF and plasma pharmacokinetics of pethidine and norpethidine in man after epidural and intrathecal administration of pethidine. *Eur J Clin Pharmacol* 1988; 34:625-31
38. Ionescu TI, Drost RH, Roelofs JM, Winckers EK, Taverne RH, van Maris AA, van Rossum JM: The pharmacokinetics of intradural morphine in major abdominal surgery. *Clin Pharmacokinet* 1988; 14:178-86
39. Gustafsson LL, Grell AM, Garle M, Rane A, Schildt B: Kinetics of morphine in cerebrospinal fluid after epidural administration. *Acta Anaesthesiol Scand* 1984; 28:535-9
40. Gourlay GK, Murphy TM, Plummer JL, Kowalski SR, Cherry DA, Cousins MJ: Pharmacokinetics of fentanyl in lumbar and cervical CSF following lumbar epidural and intravenous administration. *Pain* 1989; 38:253-9
41. Shimoyama N, Shimoyama M, Elliott KJ, Inturrisi CE: *d*-Methadone is antinociceptive in the rat formalin test. *J Pharmacol Exp Ther* 1997; 283:648-52
42. Leeson PD, Carling RW, James K, Smith JD, Moore KW, Wong EH, Baker R: Role of hydrogen bonding in ligand interaction with the *N*-methyl-D-aspartate receptor ion channel. *J Med Chem* 1990; 33:1296-305
43. Kroemer RT, Koutsilieri E, Hecht P, Liedl KR, Riederer P, Kornhuber J: Quantitative analysis of the structural requirements for blockade of the *N*-methyl-D-aspartate receptor at the phencyclidine binding site. *J Med Chem* 1998; 41:393-400
44. Thorpe DH: Opiate structure and activity-A guide to understanding the receptor. *Anesth Analg* 1984; 63:143-51
45. Parsons CG, Quack G, Bresink I, Baran L, Przegalinski E, Kostowski W, Krzascik P, Hartmann S, Danysz W: Comparison of the potency, kinetics and voltage-dependency of a series of uncompetitive NMDA receptor antagonists *in vitro* with anticonvulsive and motor impairment activity *in vivo*. *Neuropharmacology* 1995; 34:1239-58
